# Supplementary material
Source: HighWire-hosted journal article supplement (https://www.cmaj.ca/highwire/filestream/147026/field_highwire_adjunct_files/0/220508-res-1-at.pdf)
Supplement: 220508-res-1-at.pdf [file 220508-res-1-at.pdf]

## Digital Supplement 1 Domains and items covered by the COREQ checklist

| Domain                                            | Total number of items | Details of Items                                                                                                                                                                                                                                                                                                                                                                                                                                                                                                                                                                                                                   | Page location in manuscript                                                                                                                                                                                                                                                                                                                                                                                                                               |
|---------------------------------------------------|-----------------------|------------------------------------------------------------------------------------------------------------------------------------------------------------------------------------------------------------------------------------------------------------------------------------------------------------------------------------------------------------------------------------------------------------------------------------------------------------------------------------------------------------------------------------------------------------------------------------------------------------------------------------|-----------------------------------------------------------------------------------------------------------------------------------------------------------------------------------------------------------------------------------------------------------------------------------------------------------------------------------------------------------------------------------------------------------------------------------------------------------|
| <b>Domain 1:</b><br>Research team and reflexivity | 8 items               | Personal characteristics (5 items) <ul style="list-style-type: none"> <li>• Interviewer, credentials, occupation, gender, experience &amp; training</li> </ul> Relationship with participants (3 items) <ul style="list-style-type: none"> <li>• Prior relationship, participant knowledge of interviewer, interviewer characteristics</li> </ul>                                                                                                                                                                                                                                                                                  | <ul style="list-style-type: none"> <li>• Data collection (p 5)</li> <li>• N/A* (no prior relationship – see recruitment details - recruitment p 4-5)</li> </ul>                                                                                                                                                                                                                                                                                           |
| <b>Domain 2:</b><br>Study design                  | 15 items              | Theoretical framework (1 item)<br>Participant selection (4 items) <ul style="list-style-type: none"> <li>• Sampling, method of approach, sample size and non participation</li> </ul> Setting (3 items) <ul style="list-style-type: none"> <li>• Setting of data collection</li> <li>• Presence of non participants</li> <li>• Description of sample</li> </ul> Data collection (7 items) <ul style="list-style-type: none"> <li>• Interview guide</li> <li>• Repeat interviews</li> <li>• Audio/visual recording</li> <li>• Field notes</li> <li>• Duration</li> <li>• Data saturation</li> <li>• Transcripts returned</li> </ul> | <ul style="list-style-type: none"> <li>• Data collection - see development of guide (p 5)</li> <li>• Design &amp; setting, recruitment (p 4-5)</li> <li>• Design &amp; setting</li> <li>• N/A</li> <li>• Design &amp; setting, recruitment (p 4-5)</li> <li>• Data collection (p 5)</li> <li>• N/A</li> <li>• Data analysis (p 5)</li> <li>• N/A</li> <li>• Data collection (p 5)</li> <li>• All interviews were coded</li> <li>• Upon request</li> </ul> |
| <b>Domain 3:</b><br>Analysis and findings         | 9 items               | Data analysis (5 items) <ul style="list-style-type: none"> <li>• Number of coders</li> <li>• Description of coding tree</li> <li>• Derivation of themes</li> <li>• Software</li> <li>• Participant checking</li> </ul> Reporting <ul style="list-style-type: none"> <li>• Quotations presented</li> <li>• Data and findings consistent</li> <li>• Clarity of major themes</li> <li>• Clarity of minor themes</li> </ul>                                                                                                                                                                                                            | <ul style="list-style-type: none"> <li>• Data analysis (p 6)</li> <li>• Results (Tables 1-4) (p 7-8)</li> <li>• Results (p 7-8)</li> <li>• Results – Figure 2 (p 7-8)</li> <li>• Results – Figure 2 (p 7-8)</li> </ul>                                                                                                        |

\*N/A is not applicable
